# Supplementary material for: An oroxylin A-loaded aggregation-induced emission active polymeric system greatly increased the antitumor efficacy against squamous cell carcinoma
Source: Royal Society of Chemistry journal article supplement (doi:10.1039/c9tb01818b), 2020-01-01
Supplement: c9tb01818b1.pdf [file c9tb01818b1.pdf]

## Supporting Information:

### Oroxylin A-loaded aggregation-induced emission polymeric system greatly increased the antitumor efficacy against squamous cell carcinoma

Yejin Zhu <sup>a,b,1</sup>, Yongjian Guo <sup>b,1</sup>, Mengdi Liu <sup>a</sup>, Libin Wei <sup>a,\*</sup>, Xiaotang Wang <sup>b,\*</sup>

<sup>a</sup> State Key Laboratory of Natural Medicines, Jiangsu Key Laboratory of Carcinogenesis and Intervention, China Pharmaceutical University, Nanjing, P. R. China

<sup>b</sup> Department of Chemistry and Biochemistry, Florida International University, Miami, FL, USA

<sup>1</sup> These authors contributed equally to this work.

\* Corresponding author.

#### Apparatus and Materials.

The reagents and solvents were purchased from TCI (Tokyo, Japan). All other chemicals stated without specific statements were of analytical grade and from TCI. The UV-vis absorption spectra were measured on Shimadzu UV-3600. The fluorescence spectra were measured on Hitachi F-7000. NMR spectra were obtained from Bruker Avance 300 spectrometer with 400 MHz for <sup>1</sup>H NMR and 100 MHz for <sup>13</sup>C NMR and reported as parts per million (ppm) from the internal standard TMS. Molecular weight was determined by gel permeation chromatography (GPC) with a Waters 244 HPLC pump, and THF was used as solvent relative to polystyrene standards.

#### Synthesis of the conjugated AIE-active polymer.

**M-1** (0.150 g, 0.231 mmol), **M-2** (0.100 g, 0.209 mmol), **M-3** (0.012 g, 0.022 mmol), Pd(PPh<sub>3</sub>)<sub>4</sub> (0.028 g, 0.05 e.q.) and NaHCO<sub>3</sub> (2.100 g, 25.000 mmol) were dissolved in 20 mL of THF and 15 mL of water and refluxed for 10 h under an Ar atmosphere. Then, **M-4** (0.462 g, 0.40 e.q.) was added followed by refluxing for another 12 h. The reaction mixture was cooled to room temperature, and the organic layer was separated. To the organic layer was added 30 mL of CH<sub>2</sub>Cl<sub>2</sub>, followed by washing 3 times with water (50 mL) and drying with Na<sub>2</sub>SO<sub>4</sub>. After the solvent was removed, the reaction mixture was dissolved in 1 mL of CH<sub>2</sub>Cl<sub>2</sub>. The solution was dropped into 100 mL of hexane, stirred for another 30 min and filtered to obtain the conjugated polymer as a yellow solid (0.182 g). <sup>1</sup>H NMR (400 MHz, CDCl<sub>3</sub>) δ 7.82 - 7.60 (m, 5H), 7.57 - 7.44 (m, 9H), 7.23 - 7.03 (m, 9H), 3.66 (s, 78H), 3.38 (s, 0.3H), 1.99 - 0.97 (m, 6H), 1.44 - 0.92 (m, 19H), 0.81 - 0.66 (m, 9H). GPC data: Mw = 7860, Mn = 7540, PDI = 1.04.

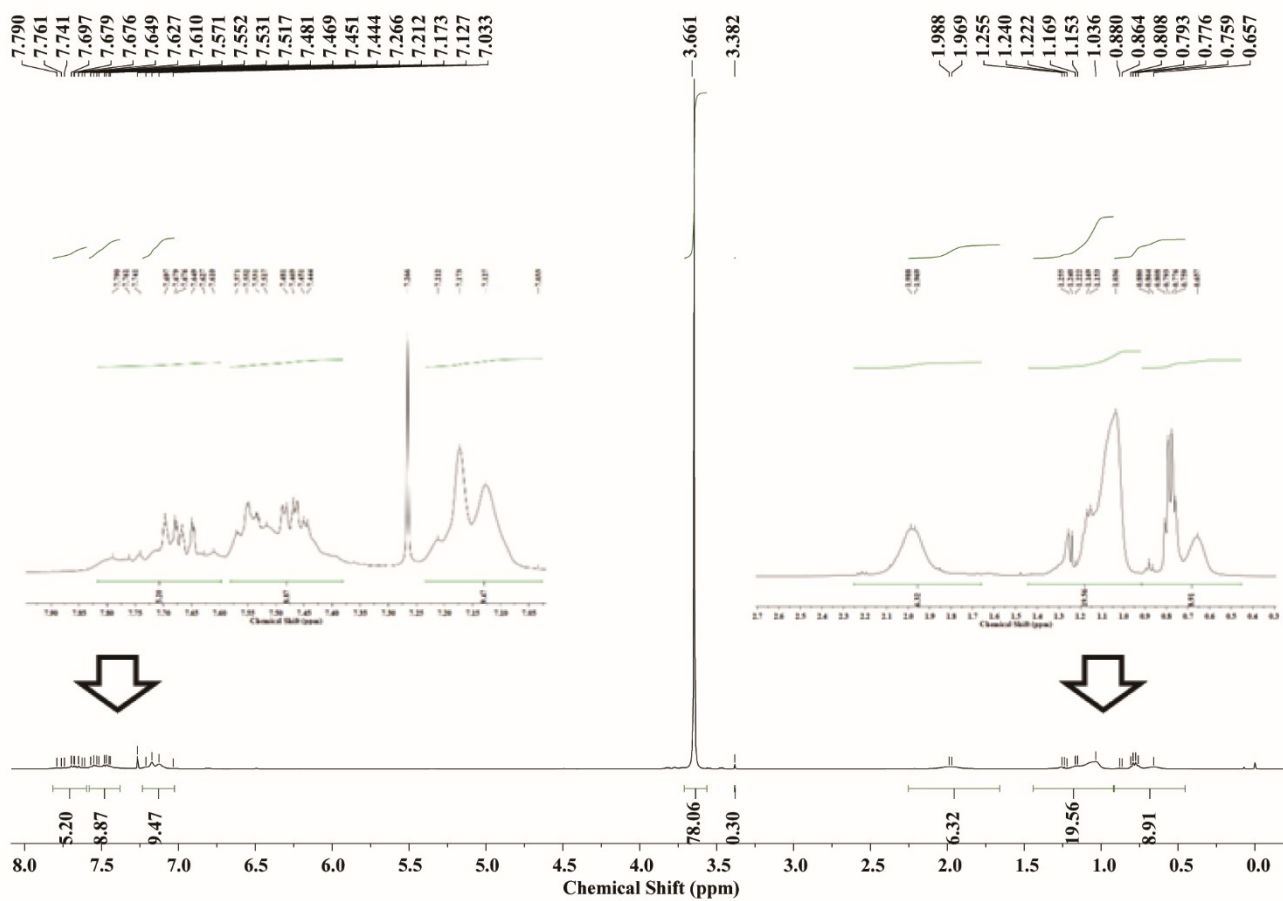

**Figure S1.**  $^1\text{H}$  NMR of conjugated polymer

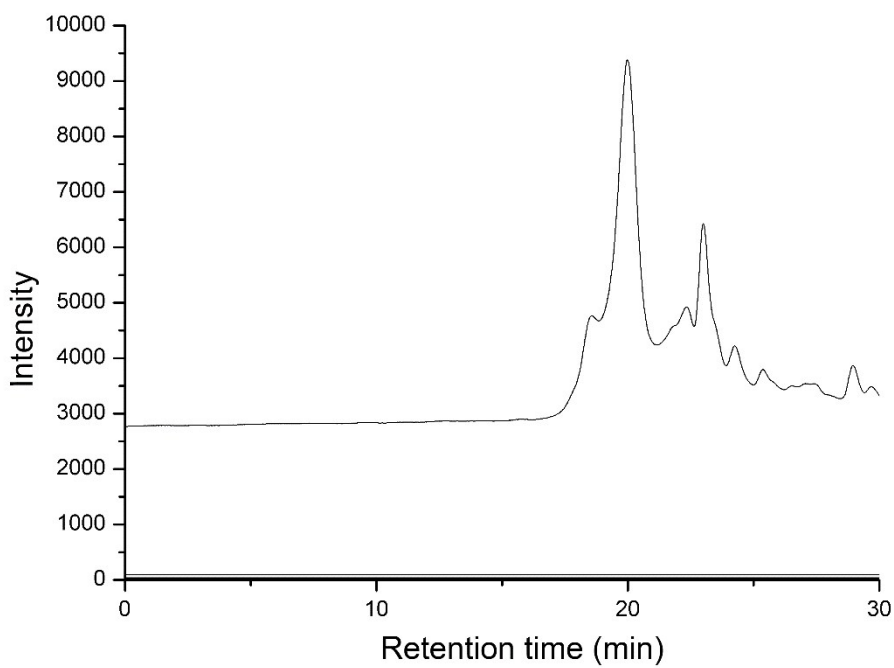

**Figure S2.** GPC data

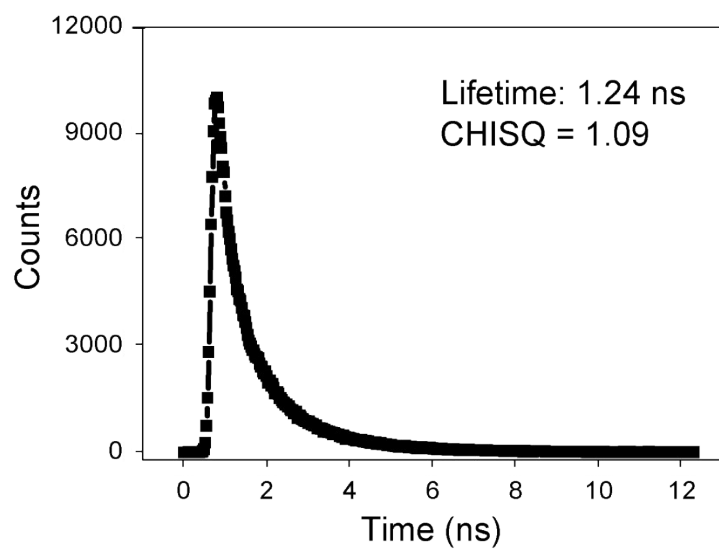

**Figure S3.** The fluorescence lifetime of conjugated polymer in  $f_w = 99\%$  solution,  $\lambda_{\text{ex}} = 374$  nm. Polymer concentration: 50 ppm.
